# Supplementary material for: Presence of insecticidal veterinary medicines in dandelions (Taraxacum officinalis) in public parks in the Netherlands
Source: Research Square preprint supplement (doi:10.21203/rs.3.rs-7398333/v1), 2025-09-29
Supplement: Supplementary file 1 [file 055bdf29a8d306e700bdc7ff.docx]

**TABLE S1, SUPPLEMENTARY MATERIAL PREPARED FOR ARTICLE:**

**‘Presence of insecticidal veterinary medicines in dandelions (*Taraxacum officinalis)* in public parks in the Netherlands’**

Jelmer Buijsa,b,*, Margriet Mantinghc & Alfons Uijtewaald, Ad M.J. Ragasa

a *Department of Environmental Science, Radboud Institute for Biological and Environmental Sciences, Faculty of Science, Radboud University, Nijmegen, The Netherlands*

*bBuijs Agro-Services, Schuurhoven 19, Bennekom, the Netherlands 6721SM*

C *Pesticide Action Network Netherlands, Anreperstraat 91 Assen 9404 LC, the Netherlands*

*dStichting Huize Aarde, Ceramstraat 24, 7512 GR Enschede, The Netherlands*

**corresponding author; E-mail address: [jelmerbuijs@gmail.com](mailto:jelmerbuijs@gmail.com) / jelmer.buijs@ru.nl*

Supplementary Material, Table 1. Description of the sampling locations

| **Location number in figure 2** | **Name of location** | **Community** | **Sampling date** | **GPS coordinates of the center** | **Access by dogs treated with anti-tick medicines** | **Remarks** |
| --- | --- | --- | --- | --- | --- | --- |
| 1 | Groene Hart Park | Zuidplas | 25/10/21 | 51.971001  4.614233 | Yes | Public park |
| 2 | Eenigenburg park | Schagen | 8/4/22 | 52.740646  4.726970 | Yes | Public park |
| 3 | Leendert Meeszstraat | Haarlem | 3/5/22 | 52.380428  4.606206 | Yes | Road side with public garden |
| 4 | Willem Dreesplantsoen | Haarlem | 3/5/22 | 52.382764  4.607496 | Yes | Public park |
| 5 | Duinvliet, meadow | Haarlem | 3/5/22 | 52.376651  4.603632 | Yes | Nature-2000* |
| 6 | Marken, northern ringdike | Waterland | 5/5/22 | 52.465745  5.109810 | Yes | Public park |
| 7 | Vondelpark | Amsterdam | 7/5/22 | 52.36050  4.87732 | Yes | Public park |
| 8 | Noorderplantsoen | Groningen | 7/5/22 | 53.224127  6.555976 | Yes | Public park |
| 9 | Bloemenbuurt | Arnhem | 8/5/22 | 51.965025  5.916984 | Yes | Public garden along street |
| 10 | Landschapspark Moerenburg | Tilburg | 8/5/22 | 51.557257  5.123285 | Yes | Public park |
| 11 | Haagse Bos en Malieveld | Den Haag | 9/5/22 | 52.088228  4.328947 | Yes | Public park |
| 12 | Kralingse Bos | Rotterdam | 11/5/22 | 51.931127  4.526523 | Yes | Public park |
| 13 | Potgietersingel | Zwolle | 12/5/22 | 52.509469  6.091463 | Yes | Public park |
| 14 | Asserbos | Assen | 18/5/22 | 52.984837  6.553200 | Yes | Public park |
| 15 | Duinvliet | Haarlem | 29/5/22 | 52.375314  4.602242 | Yes | Nature-2000* |
| 16 | De Groote Voort, organic dairy farm (control) | Lunteren | 17/5/22 | 52.085719  5.584697 | No | Dairy farm with Jersey cows |
|  |  |  |  |  |  |  |

*protected nature conservation area under European legislation Nature-2000
