# Supplementary material for: Presence of insecticidal veterinary medicines in dandelions (Taraxacum officinalis) in public parks in the Netherlands
Source: Research Square preprint supplement (doi:10.21203/rs.3.rs-7398333/v1), 2025-09-29
Supplement: Supplementary file 2 [file 258f65c0abf1943fafe85089.docx]

**TABLE S3, SUPPLEMENTARY MATERIAL PREPARED FOR ARTICLE:**

**‘Presence of insecticidal veterinary medicines in dandelions (*Taraxacum officinalis)* in public parks in the Netherlands’**

Jelmer Buijsa,b,*, Margriet Mantinghc & Alfons Uijtewaald, Ad M.J. Ragasa

a *Department of Environmental Science, Radboud Institute for Biological and Environmental Sciences, Faculty of Science, Radboud University, Nijmegen, The Netherlands*

*bBuijs Agro-Services, Schuurhoven 19, Bennekom, the Netherlands 6721SM*

C *Pesticide Action Network Netherlands, Anreperstraat 91 Assen 9404 LC, the Netherlands*

*dStichting Huize Aarde, Ceramstraat 24, 7512 GR Enschede, The Netherlands*

**corresponding author; E-mail address:* [*jelmerbuijs@gmail.com*](mailto:jelmerbuijs@gmail.com) */ jelmer.buijs@ru.nl*

**Supplementary Material, Table 3. List of analysed compounds**

**Analysis 1: Pesticides GC-MSMS (GC-MS-Triplequad WVS-092)**

**Pesticide (active compound)**

**The reporting limits (LOQ) are indicated in the table with measured values, separately for each sample (Supplementary Information, Table 8)**

3, 4-Chloroaniline*

1-Naphthylacetamide

1-Naphtol (degradation Carbaryl) Q*

1,4-Dimethylnaphthalene

2,4,6-Trichlorophenol*

2,6-Dichlorobenzamide (degradation Dichlobenil) Q*

3,4-Dichloroaniline*

3,5-Dichloroaniline (degradation Iprodion)*

4,4-Dichlorobenzophenon

(degradation Dicofol)*

Acibenzolar-S-methyl

Aclonifen Q

Acrinathrin Q

Alachlor Q

Aldrin Q

Allethrin Q

Ametryn Q

Aminocarb

Amitraz

Anthraquinone Q

Azinphos-ethyl

Azoxystrobin Q

Benalaxyl Q

Bendiocarb

Benfluralin

Benfuracarb as carbofuran

Bifenazate

Bifenox Q

Bifenthrin Q

Biphenyl Q

Bitertanol Q

Bromacil (ECD)

Bromocyclen

Bromophos-ethyl Q

Bromophos-methyl Q

Bromopropylate Q

Bromoxynil-octanoate

Bromuconazole Q

Bupirimate Q

Buprofezin Q

Butralin

Cadusafos Q

Captafol (ECD)

Captan (ECD)

Carbaryl Q

Carbofuran Q

Carbofuran-phenol Q*

Carbophenothion

Carbophenothion-methyl**

Chinomethionat

Chlorbufam

Chlordane-cis Q

Chlordane-trans Q

Chlorfenapyr Q (ECD)

Chlorfenson Q

Chlorfenvinphos-cis Q

Chlorfenvinphos-trans Q

Chloridazon

Chlorobenzilate

(degradation Dicofol) Q

Chloroneb

Chlorothalonil Q

Chlorpropham Q

Chlorpyrifos Q

Chlorpyrifos-methyl Q

Chlorthal-dimethyl Q

Chlorthiamid (ECD)

Chlozolinate Q

Clodinafop-propargyl

Clomazone Q

Cloquintocet-mexyl

Coumafos

Cyanazine

Cyanofenphos

Cyanophos

Cycloate

Cyfenothrin Q

Cyfluthrin Q

Cyhalothrin

Cypermethrin Q

Cyproconazole Q

Cyprodinil Q

Deltamethrin Q

Demeton-O Q

Demeton-S Q

Demeton-S-methyl

Desmetryn

Diazinon Q

Dichlobenil (degradation Chlorthiamid)

Dichlofenthion Q

Dicloran Q

Dicofol

Dieldrin Q

Diethofencarb Q

Difenoconazole Q

Diflufenican Q

Dimethipin

Dimethoate Q

Dimethylaminosulfotoluidide

(DMST) Q

Dimethylvinphos

Diniconazole Q

Dioxabenzofos

Diphenamide

Diphenyl Q

Diphenylamine Q

Disulfoton Q

Disulfoton sulfone Q

Disulfoton sulfoxide

Ditalimfos Q

Endosulfan (alpha-) Q

Endosulfan (beta-) Q

Endosulfan-sulphate Q

Endrin (ECD)

EPN Q

Epoxiconazole Q

EPTC

Etaconazole

Ethion Q

Ethofumesate Q

Ethoprophos Q

Ethoxyquin

Etofenprox Q

Etridiazole (ECD)

Etrimfos Q

Famoxadone

Fenarimol Q

Fenazaquin Q

Fenchlorphos

Fenfluthrin

Fenitrothion Q

Fenkapton

Fenobucarb Q

Fenoxycarb Q

Fenpiclonil Q

Fenpropathrin Q

Fenpropidin Q

Fenpropimorph Q

Fenpyroximate Q

Fenson

Fensulfothion Q

Fenthion Q

Fenthion sulfoxide Q

Fenvalerate + Esfenvalerate Q

Fipronil Q

Fipronil sulfone

Fluazifop-butyl Q

Flubenzimine

Fluchloralin

Flucythrinate Q

Fludioxonil Q

Fluquinconazole Q

Flurprimidole

Flusilazole Q

Flutolanil Q

Fluvalinate Q

Folpet (ECD)

Fonofos

Formothion Q

Fthalimide (degradation Folpet)

Fosthietan

Fuberidazole

Furalaxyl Q

Halfenprox

Haloxyfop-ethoxyethyl Q

HCH (alpha-) Q

HCH (beta-)

HCH (delta-) Q

HCH (gamma-) (= Lindane)

Heptachlor Q (ECD)

Heptachlor-endo-epoxide (trans)

Heptachlor-exo-epoxide (cis)

Heptenophos Q

Hexachlorobenzene Q

Hexachlorobutadiene Q **

Hexaconazole Q

Hexazinone

Imazethapyr

Iodofenphos

Iprobenfos

Iprodione Q

Isazofos

Isocarbophos Q

Isodrin Q

Isofenphos Q

Isofenphos-methyl Q

Isofenphos-oxon

(degradation Isofenphos)*

Isoprocarb

Isoproturon Q

Isoxadifen-ethyl

Kresoxim-methyl Q

Lambda-Cyhalothrin Q

Lenacil Q

Leptofos

Malaoxon (degradation Malathion )

Malathion Q

Mecarbam Q

Mephosfolan Q

Mepanipyrim Q

Mepronil Q

Metalaxyl Q

Metazachlor Q

Methabenzthiazuron Q

Methacrifos

Methidathion Q

Methiocarb Q

Methoxychlor

Metobromuron

Metolachlor-S Q

Metolcarb

Metoprotryn

Metrafenone Q

Metribuzin Q

Mevinphos Q

Mirex

Molinate

Myclobutanil Q

Napropamide Q

Nitrofen

Nitropyrin

Nitrothal-Isopropyl

Norflurazon

o,p’-DDD Q *

o,p’-DDE Q *

Ofurace Q

Oxadiazon Q

Oxadixyl Q

Oxychlordane*

Oxyfluorfen

p,p’-DDD + o,p’-DDT Q

p,p’-DDE Q

p,p’-DDT

Paraoxon*

Paraoxon-methyl

Parathion Q

Parathion-methyl Q

Penconazole Q

Pencycuron

Pendimethalin Q

Pentachloroaniline Q

Pentachloroanisol Q

Pentachlorobenzene Q

Pentachlorophenol

Permethrin-cis Q

Permethrin-trans Q

Perthaan

Phenothrin Q

Phenthoate Q

Phenylphenol-2 Q

Phosalone Q

Phospholan

Phosmet Q

Picoxystrobin Q

Piperonyl butoxide Q

Pirimicarb Q

Pirimicarb-desmethyl Q *

Pirimicarb-desmethylformamido*

Pirimiphos-ethyl Q

Pirimiphos-methyl Q

Procymidone Q

Profenofos Q

Profluralin Q

Profoxydim

Promecarb Q

Prometryn Q

Propachlor Q

Propanil Q

Propargite Q

Propazine Q

Propetamphos

Propham Q

Propiconazole Q

Propoxur Q

Propoxycarbazone

Propyzamide Q

Prosulfocarb Q

Prothioconazole**

Prothioconazole-desthio

Prothiofos Q

Pyraflufen-ethyl

Pyrazophos Q

Pyridaben Q

Pyridaphenthion Q

Pyrifenox

Pyrimethanil Q

Pyriproxyfen Q

Quinalphos Q

Quinoxyfen Q

Quintozene Q

Quizalofop-ethyl

S 421

Silthiofam

Simazine Q

Spiromesifen Q

Spiroxamine Q

Sulfotep

Sulphur **

Sulprofos

Tebuconazole Q

Tebufenpyrad Q

Tecnazene Q

Tefluthrin Q

Telodrin Q

Terbacil

Terbumeton

Terbutryn Q

Terbutylazine Q

Terbutylazine-desethyl*

Tetrachlorovinphos (Z-) Q

Tetraconazole Q

Tetradifon Q

Tetrahydrofthalimide (degradation

captan/captafol)

Tetramethrin Q

Tetrasul

Tolclofos-methyl Q

Transfluthrin Q

Triadimefon Q

Triadimenol Q

Tri-allate Q

Triazamate Q

Triazophos Q

Trichloronat

Trifloxystrobin Q

Triflumizole Q

Trifluralin Q

Trinexapac-ethyl

Vinclozolin Q

The reporting limits mentioned are indicative and can change depending on the matrix and the

circumstances of the analysis.

Q: Accreditated by the Raad voor Accreditatie (registration number L201).

* These metabolites according to EU regulation 396/2005 will not be reported with an MRL. Only on

request this will be reported.

** Only on request these analytes will be reported.

**Exceptions of the GC-MSMS analysis concerning the reporting**

If a pesticide can’t be detected for example due to matrix interference, this will be mentioned on the

analysis report with a remark.

ECD: This pesticide is qualified with GC-MSMS. The quantification and confirmation is determined

with GC-MSMS. The GC-MSMS analysis 1 consists of a total number of 323 pesticides.

The accreditation other than fruit and vegetables, will be shown on DRF-260 Flexible scope.

**Analysis 2: Pesticides GC-MSMS (GC-MS-Triplequad WVS-192) Pesticide**

**(active compound)**

**The reporting limits (LOQ) are indicated in the table with measured values, separately for each sample (Supplementary Information, Table 8)**

Acetochlor

Aziprotryne

Benazolin-ethylester

Benodanil

Benzoylprop-ethyl

Bifenazaat-diazeen

Binapacryl

Butylate

Chlorbenside

Chlordecone-hydrate

Chlormefos

Chloro-4-methyl-3-phenol

Chlorobenzilate

Chloropropylate

Chloroxuron

Crufomate

Cyhalofop-butyl

Cymiazole

Cyprofuram

Dazomet

Dialifos

Di-allate

Diclofop-methyl

Diethatyl-ethyl

Difenoxuron

Dimethachlor

Dinobuton

Dinoterb

Dioxacarb

Dioxathion

Edifenphos

Fenfuram

Fenothiocarb

Fenoxaprop-P-ethyl

Fenuron

Flamprop-isopropyl

Flamprop-methyl

Fluometuron

Flurenol-butyl

Flurochloridone

Haloxyfop-methyl

Hexabromobenzene

Methoprene

Methoprotryne

Mevinphos

Mexacarbate

Monalide

Orbencarb

Pentanochlor

Piperalin

Plifenate

Propaphos

Prothoate

Pyroquilon

Resmethrin

Tebupirimfos

Tebuthiuron

TEPP

Triamifos

Trietazine

Trifenmorph

Vernolate

The reporting limits mentioned are indicative and can change depending on the matrix and the

circumstances of the analysis.

**Exceptions of the GC-MS standard concerning the reporting**

If a pesticide can’t be detected for example due to matrix interference, this will be mentioned on the

analysis report with a remark. The GC-MS analysis 2 consists of a total number of 60 pesticides

**Analysis 3: Pesticides LC-MSMS standard (method WVS-040). Pesticide (active compound)**

**The reporting limits (LOQ) are indicated in the table with measured values, separately for each sample (Supplementary Information, Table 8)**

4-Bromophenylurea

6-Benzyladenine

Abamectine Q

Acephate Q

Acequinocyl

Acetamiprid Q

Alanycarb

Aldicarb Q

Aldicarb sulfone Q

Aldicarb sulfoxide Q

Ametoctradin

Aminopyralid 0.25

Amisulbrom

Amitraz ***

Amitraz DMA ***

Amitraz DMF ***

Amitraz DMPF ***

Amitrole 0.50

Anilazine

Asulam Q

Atrazine Q

Azaconazole Q

Azadirachtin

Azamethiphos Q

Azimsulfuron Q

Azinphos-methyl Q

Azoprotryne

Azoxystrobin Q

Barban

Beflubutamid

Benfuracarb Q as carbofuran

Benomyl Q as carbendazim

Benoxacor Q

Benthiavalicarb-isopropyl Q

Benzoximate

Bitertanol Q

Bixafen

Boscalid Q

Bromuconazole Q

Bupirimate Q

Buprofezin Q

Butafenacil Q

Butocarboxim

Butocarboxim sulfoxide Q*

Butoxycarboxim Q

Buturon Q

Caffeine **

Carbaryl Q

Carbendazim Q

Carbetamide

Carbofuran Q

Carbofuran-3-hydroxy Q

Carbofuran-3-keto Q *

Carbosulfan

Carboxin

Carfentrazone-ethyl

Carpropamide Q

Chlorantraniliprole Q (Rynaxypyr)

Chlorbromuron Q

Chlordimeform

Chlorfluazuron

Chlorotoluron

Chloroxuron

Chlorthiophos Q

Chlorthiophos sulfone Q *

Cinnerin

Clethodim Q

Climbazol Q

Clofentezine Q

Clopyralid 0.50

Clothianidin Q

Crimidine Q

Cyantraniliprole (Cyazypyr)

Cyazofamid

Cycloxydim Q

Cyflufenamid Q

Cyflumetofen

Cymoxanil Q

Cyproconazole Q

Cyprodinil Q

Cyromazine Q ***

Cythioate Q

Daminozide *** 0.50

DEET Q

Demeton-S-methyl sulfone Q

Demeton-S-methyl sulfoxide (=oxydemeton-methyl) Q

Desmedipham Q

Diafenthiuron Q

Dichlofluanid Q

Dichlorvos

Diclobutrazol

Dicrotophos Q

Diethofencarb Q

Difenoconazole Q

Diflubenzuron Q

Dimethenamid Q

Dimethirimol Q

Dimethoate Q

Dimethomorph Q

Dimethylaminosulfotoluidide (DMST) Q

Dimoxystrobin Q

Diniconazole Q

Dinotefuran Q

Dipropetryn Q

Diuron Q

DMSA Q *

Dodemorph Q

Dodine Q

Emamectin (benzoate B1a) Q

Epoxiconazole Q

Ethiofencarb Q

Ethiofencarb sulfone Q *

Ethiofencarb sulfoxide Q*

Ethiprole

Ethirimol Q

Ethoxysulfuron

Etofenprox Q

Etoxazole Q

ETU 0.50

Famophos ( = Famphur) Q

Famoxadone Q

Fenamidone Q

Fenamiphos Q

Fenamiphos sulfone

Fenamiphos sulfoxide

Fenarimol Q

Fenazaquin Q

Fenbuconazole Q

Fenbutatin oxide***

Fenhexamid Q

Fenoxycarb Q

Fenpropidin Q

Fenpropimorph

Fenpyrazamine

Fenpyroximate Q

Fenthion Q

Fenthion-oxon

Fenthion-oxon sulfone

Fenthion-oxon sulfoxide

Fenthion sulfone

Fenthion sulfoxide Q

Fenuron

Flazasulfuron

Flonicamid Q

Florasulam Q

Fluazifop-P-butyl Q

Flubendiamide Q

Flucycloxuron Q

Flufenacet Q

Flufenoxuron Q

Flumioxazine Q

Fluopicolide Q

Fluopyram Q

Fluotrimazol Q

Fluoxastrobin Q

Fluquinconazole Q

Flurochloridone

Fluroxypyr

Fluroxypyr-1-methylheptylester Q

Flurpyridafurone

Flupyrsulfuron-methyl

Flusilazole Q

Fluthiacet-methyl

Flutolanil Q

Flutriafol Q

Fluxapyroxad

Foramsulfuron

Forchlorfenuron

Formetanate hydrochloride Q

Fosetyl-Al***

Fosthiazate Q

Furalaxyl Q

Furathiocarb Q

Furmecyclox Q

Halofenozide

Haloxyfop Q

Hexaconazole Q

Hexaflumuron Q

Hexythiazox Q

Hymexazol Q 0.10

Imazamethabenz-methyl

Imazalil Q

Imazamox

Imazaquin Q

Imibenconazole Q

Imidacloprid Q

Indoxacarb Q

Iodosulforon-methyl

Iprovalicarb Q

Isocarbophos Q

Isoprothiolane Q

Isopyrazam Q

Isouron Q

Isoxaben Q

Isoxaflutole Q

Isoxathion Q

Jasmolin

Kresoxim-methyl

Lenacil Q

Linuron Q

Lufenuron Q

Malathion Q

Maleic hydrazide Q*** 0.50

Mandipropamid

Mefenacet Q

Mefenpyr-diethyl Q**

Mepanipyrim Q

Mephosfolan Q

Mepronil

Mesosulfuron-methyl

Mesotrione Q

Metaflumizone

Metalaxyl Q

Metaldehyde

Metamitron Q

Metconazole Q

Methamidophos Q

Methidathion Q

Methiocarb (=mercaptodimethur) Q

Methiocarb sulfone Q

Methiocarb sulfoxide Q

Methomyl Q

Methoxyfenozide Q

Metobromuron Q

Metosulam

Metoxuron Q

Metsulfuron-methyl

Milbemectin 0.10

Monocrotophos Q

Monolinuron Q

Monuron Q

Myclobutanil Q

Naled

Neburon

Nicosulfuron

Nitenpyram Q

Nitralin

Novaluron

Nuarimol Q

Omethoate Q

Oxadixyl Q

Oxamyl Q

Oxamyl-Oxime Q*

Oxasulfuron

Oxycarboxin Q

Paclobutrazol Q

Paraoxon-ethyl Q*

Paraoxon-methyl

Pebulate

Penconazole Q

Pencycuron Q

Penflufen

Penthiopyrad

Phenisopham

Phenmedipham Q

Phorate

Phorate sulfone

Phorate sulfoxide*

Phosalone Q

Phosmet Q

Phosmet-oxon Q

Phosphamidon Q

Phoxim

Picaridin (= Icaridin)**

Picolinafen Q

Picoxystrobin Q

Pinoxaden

Piperonyl butoxide Q

Pirimicarb Q

Pirimicarb-desmethyl Q *

Prochloraz Q

Prochloraz-desimidazole-amino

Prochloraz-desimidazoleformylamino

Profenofos Q

Propamocarb hydrochloride Q***

Propaquizafop Q

Propiconazole Q

Propoxur Q

Propyzamide Q

Proquinazid Q

Prosulfocarb

Prosulfuron

Prothiocarb

Prothiocarb hydrochloride Q

Prothioconazole**

Prothioconazole-desthio

Pymetrozine Q

Pyracarbolid

Pyraclofos

Pyraclostrobin Q

Pyrazophos Q

Pyrethrin

Pyridaben Q

Pyridaphenthion Q

Pyridalyl Q

Pyridate Q

Pyridate (metabolite) (=6-chloro4-hydroxy-3-phenyl-pyridazin) Q CL9673

Pyrifenox Q

Pyrimethanil Q

Pyrimidifen

Pyriproxyfen Q

Pyroxsulam

Quinclorac Q

Quinmerac

Quizalofop

Rimsulfuron

Rotenone Q

Saflufenacil

Sethoxydim Q

Silafluofen Q

Simazine Q

Spinetoram

Spinosad (A and D) Q

Spirodiclofen Q

Spirotetramat Q

Spirotetramat cis-enol Q

Spirotetramat cis-keto-hydroxy Q

Spirotetramat enol-glucoside

Spirotetramat mono-hydroxy Q

Spiroxamine Q

Sulcotrione Q

Sulfentrazone Q

Sulfoxaflor

Tebuconazole Q

Tebufenozide Q

Tebufenpyrad Q

Teflubenzuron Q

Tembotrione

Tepraloxydim Q

Terbufos

Terbufos sulfone *

Terbufos sulfoxide *

Terbutylazine

Terbutylazine-desethyl

Tetraconazole Q

Thiabendazole Q

Thiacloprid Q

Thiametoxam Q

Thidiazuron Q

Thiencarbazone-methyl

Thifensulfuron-methyl

Thiobencarb Q

Thiocyclam Q

Thiodicarb Q

Thiofanox

Thiofanox sulfone Q*

Thiofanox sulfoxide Q*

Thiophanate-methyl Q

Thiometon

Tolclofos-methyl

Tolfenpyrad

Tolylfluanid Q

Tralkoxydim Q

Triadimefon Q

Triadimenol Q

Triapenthenol Q

Triazophos Q

Triazoxide

Tribenuron-methyl

Trichlorfon Q

Tricyclazole Q

Tridemorph Q

Trifloxystrobin

Triflumizole Q

Triflumizole-FM-6-1

Triflumuron Q

Triflusulfuron-methyl

Triforine Q

Trimethacarb-3,4,5 (=Landrin) Q

Trinexapac-ethyl Q

Triticonazole Q

Tritosulfuron

Uniconazole

Valifenalate

Vamidothion Q

Warfarin

XMC

Zoxamide Q

**Analysis 4: Pesticides LC-MSMS (method WVS-040) Pesticide (active compound)**

**The reporting limits (LOQ) are indicated in the table with measured values, separately for each sample (Supplementary Information, Table 8)**

1-Naphthylacetic acid

1,2,4-Triazole* 0.10

2-Naphtyloxyacetic acid

2,4-D Q

2,4-DB

2,4,5-T

2,4,6-Trichlorophenoxy acetic acid*

4-CPA (4-chlorophenoxyacetic acid =PCPA)

Bentazone Q

Benzovindiflupyr

Bromoxynil

Chloramben 0.10

Chlordecone hydrate

Chlorothalonil-4-hydroxy****

Chlorthion

Cyclanilide

Cyenopyrafen

Dicamba

Dichlorophen

Dichlorprop

Dinocap Q

Dithianon Q

Fenoprop (2,4,5-TP)

Fipronil

Fipronil-sulfone

Flonicamid TFNA-AM *

Flonicamid-TFNA

Flonicamid-TFNG

Fluazifop (free acid)

Fluazinam Q

Imazamox

Ioxynil

MCPA Q

MCPB

Mecoprop Q

Meptyldinocap

Picloram 0.10

Prohexadione-calcium

Triclopyr

The reporting limits mentioned are indicative and can change depending on the matrix and the

circumstances of the analysis.

Q: Accreditated by the Raad voor Accreditatie (registration number L201).

* These metabolites according to EU regulation 396/2005 will not be reported with an MRL. Only on

request this will be reported.

** Only on request these analytes will be reported.

*** Quantification takes place by separate provision with a single residue method.

By request we can report this analyte.

**** Chlorothalonil-4-hydroxy is a metabolite of Chlorothalonil. This metabolite will be according to EU

regulation 396/2005 reported for food of animal origin except honey.

***** Caffeine is no pesticide and will be only reported by request.

****** 2,4,6-Trichlorophenoxy acetic acid is a metabolite of Prochloraz. This metabolite according to EU

regulation 396/2005 will not be reported. On request we can report this metabolite.

**Exceptions reporting the LC-MSMS standard analysis**

DRF-133-14 Analysepakket pesticiden Engels Pagina 11 van 14

If a pesticide can’t be detected, for example due to matrix interference, this will be mentioned on the

analysis report with a remark.

The LC-MSMS analysis 3 and 4 consists of a total number of 415 pesticides.

The accreditation other than fruit and vegetables, will be shown on DRF-260 Flexible scope.

**Glyphosate (WVS-145)** Q **LC-MSMS**

**The reporting limits (LOQ) are indicated in the table with measured values, separately for each sample (Supplementary Information, Table 8)**

Glyphosate

Glufosinate-ammonium (Glufosinate, N-Acetyl-Glufosinate en 3-MPPA)

AMPA
