# Supplementary material for: Presence of insecticidal veterinary medicines in dandelions (Taraxacum officinalis) in public parks in the Netherlands
Source: Research Square preprint supplement (doi:10.21203/rs.3.rs-7398333/v1), 2025-09-29
Supplement: Supplementary file 3 [file 6a3b14a7e538abcd3ab3c4c6.docx]

**SECTION S2, SUPPLEMENTARY MATERIAL PREPARED FOR ARTICLE:**

**‘PRESENCE OF PESTICIDES AND VETERINARY MEDICINES IN DANDELIONS (*TARAXACUM OFFICINALIS)* IN PUBLIC PARKS IN THE NETHERLANDS’**

Jelmer Buijsa,b,*, Ad M.J. Ragasa, A. Jan Hendriksa & Margriet Mantinghc

a *Department of Environmental Science, Radboud Institute for Biological and Environmental Sciences, Faculty of Science, Radboud University, Nijmegen, The Netherlands*

*bBuijs Agro-Services, Schuurhoven 19, Bennekom, the Netherlands 6721SM.*

c*Mantingh Environment and Pesticides, Anreperstraat 9 Assen 9404 LC, the Netherlands*

**corresponding author at Department of Environmental Science, Radboud Institute for Biological and Environmental Sciences, Faculty of Science, Radboud University, Nijmegen, The Netherlands E-mail address:* [*jelmer*](mailto:jelmerbuijs@gmail.com)*.buijs@ru.nl*

Supplementary Material, Section 2. Description of the processing and analysis of samples

The processing and chemical analysis consisted of the steps explained below:

*Drying and grinding*: The vegetation samples had an average fresh weight of 726 grams (standard deviation 174 grams). From the samples subsamples were taken. They were freeze-dried and their water content was determined based on the weight difference between the wet and freeze-dried samples. The dried subsamples of dandelions were grinded.

*Extraction*: 1-10 g of each dried and grinded sample (depending on the matrix) was extracted with a mixture of three solvents: acetone (10ml), petroleum-ether (10ml) & dichloromethane (5ml). Internal standards of PCB-153, triphenylphosphate and TDCPP were added to the dichloromethane as a control for the pre-treatment and the stability of the injection of the measuring device. This was tested before use. After addition of the solvents, 7 grams of salt mixture was added to the extraction: sodium citrate (15.4%), sodium hydrogen citrate sesquihydrate (7.7%), magnesium sulphate (61.5%) and sodium chloride (15.4%). Extraction was performed during 2 minutes while being mixed at 640 RPM and subsequently the mixture was centrifugated for 10 minutes at 17,105g.

*Clean-up*: All samples were cleaned by thermal clean-up (on dry ice), followed by a chemical clean-up using florisil for dispersive solid-phase extraction (dSPE). For samples with a high pigment rate, i.e. excrements and vegetation, florisil was combined with graphitized carbon black (GCB) and primary-secondary amine (PSA).

*Preparation for analysis*: The solvents of the cleaned extract were evaporated at 50°Celsius in a Zymark TurboVap LV Workstation. After reaching room temperature, the residue was dissolved in a 9:1 iso-octane/toluene mixture (v/v) for GC or in acidified methanol for LC. The residue was homogenized with a tube vortex and the extract was filtered through a round regenerated cellulose filter suitable for organic solvents.

*Analysis*: The supernatant of the centrifuged samples was analysed using GC-MS/MS (Agilent Intuvo 9000 GC coupled to an Agilent 7010B Triple Quad-Detector MS with Enhanced Masshunter operating system version B.07.06.2704 and MassHunter quantitative analysis software version 8.00, build 8.0.598.0). The GC was equipped with a G4513A injector and a G4520A autosampler. For LC-MS/MS, the Agilent 1290 series UHPLC was used with an TQ-5500 MS (Triple Quad-detector) of Sciex. In total the presence of 661 pesticides, biocides and metabolites was tested, which were in the standard package of the laboratory (Table S2).

*Quality control*: After each series of 10 samples, a QC (Quality Control) sample was injected and analysed, containing all 661 substances (pesticides, biocides and metabolites) in a solvent without matrix at concentrations matching the middle of the calibration line. Per group of 10 samples of the same matrix, spiked samples were added in order to determine the recovery of each substance. If the recovery was between 30%-80% or between 120-140%, the measured concentrations were corrected using the standard addition. In between 80-120% recovery, measured concentrations were not corrected.
