# Supplementary material for: Presence of insecticidal veterinary medicines in dandelions (Taraxacum officinalis) in public parks in the Netherlands
Source: Research Square preprint supplement (doi:10.21203/rs.3.rs-7398333/v1), 2025-09-29
Supplement: Supplementary file 4 [file fbe1c54d911228fd07c65958.docx]

**TABLE S4, SUPPLEMENTARY MATERIAL PREPARED FOR ARTICLE:**

**‘Presence of insecticidal veterinary medicines in dandelions (*Taraxacum officinalis)* in public parks in the Netherlands’**

Jelmer Buijsa,b,*, Margriet Mantinghc & Alfons Uijtewaald, Ad M.J. Ragasa

a *Department of Environmental Science, Radboud Institute for Biological and Environmental Sciences, Faculty of Science, Radboud University, Nijmegen, The Netherlands*

*bBuijs Agro-Services, Schuurhoven 19, Bennekom, the Netherlands 6721SM*

C *Pesticide Action Network Netherlands, Anreperstraat 91 Assen 9404 LC, the Netherlands*

*dStichting Huize Aarde, Ceramstraat 24, 7512 GR Enschede, The Netherlands*

**corresponding author; E-mail address:* [*jelmerbuijs@gmail.com*](mailto:jelmerbuijs@gmail.com) */ jelmer.buijs@ru.nl*

**Table S4; Original measured values of veterinary medicines and other insecticides in Taraxacum officinalis**
